# Supplementary material for: BRD4 Inhibition Protects Against Acute Pancreatitis Through Restoring Impaired Autophagic Flux
Source: PubMed Central journal article supplement (PMC7227015; doi:10.3389/fphar.2020.00618), 2020-05-08
Supplement: DataSheet_2.pdf [file DataSheet_2.pdf]

# Figure 1

BRD4

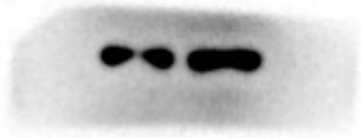

$\beta$ -actin

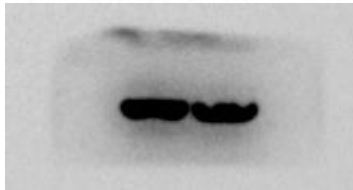

Ctrl CER

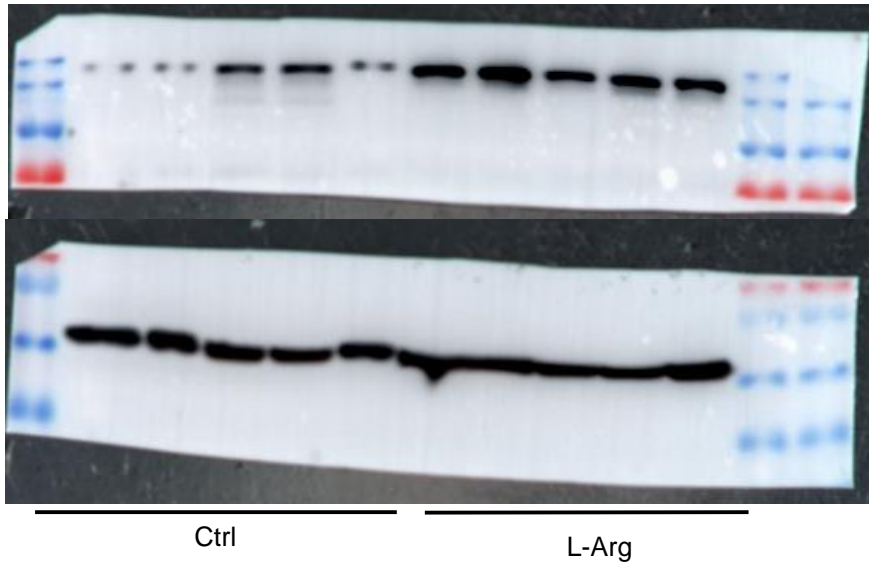

Ctrl

L-Arg

BRD4

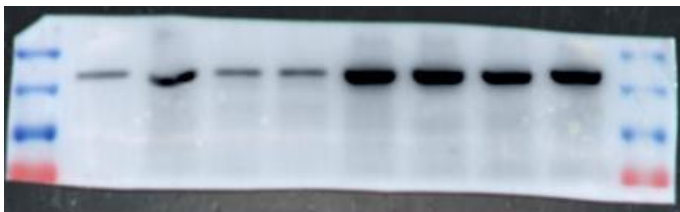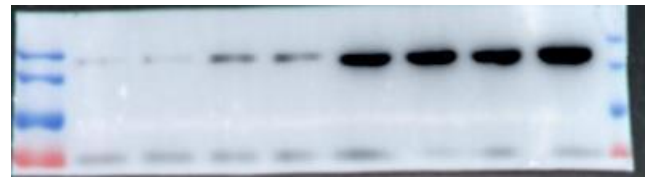

$\beta$ -actin

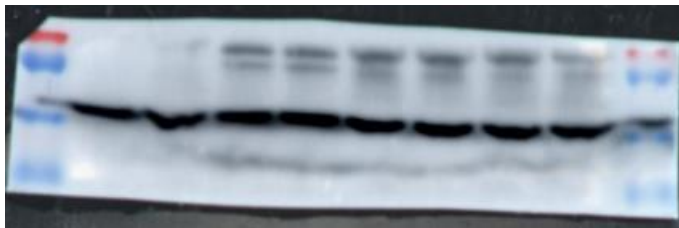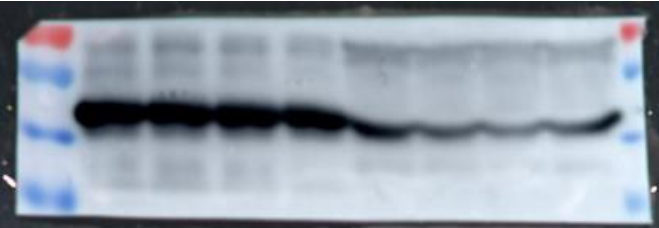

Ethanol

POA+Ethanol

Sham

NaT

Figure 3

LC3B I  
LC3B II

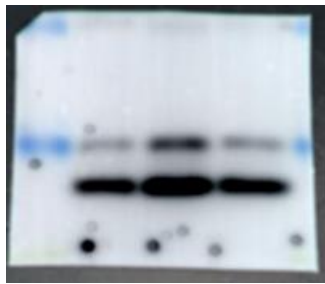

P62

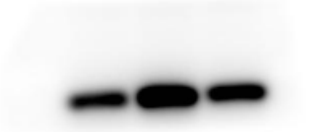

β-actin

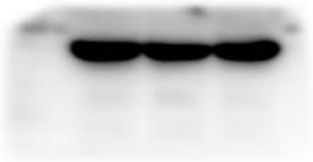

|     |   |   |   |
|-----|---|---|---|
| CCK | - | + | + |
| JQ1 | - | - | + |

ATG14

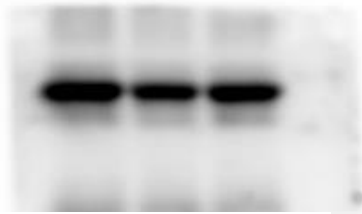

STX17

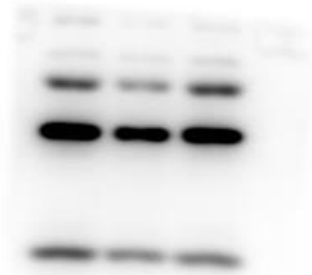

β-actin

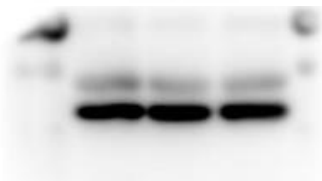

LAMP2

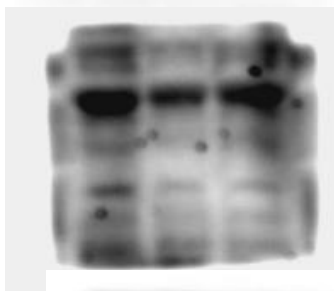

β-actin

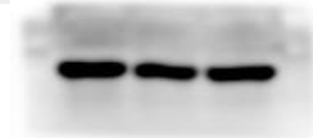

|     |   |   |   |
|-----|---|---|---|
| CCK | - | + | + |
| JQ1 | - | - | + |

pAMPK

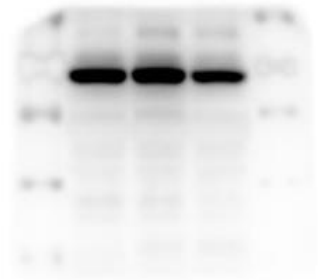

AMPK

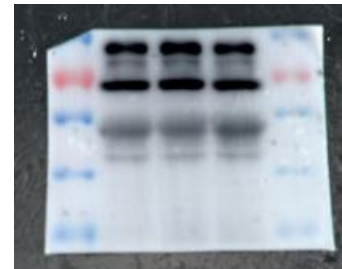

pmTOR

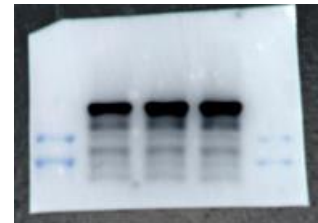

mTOR

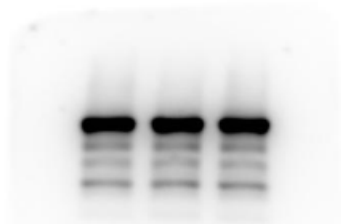

β-actin

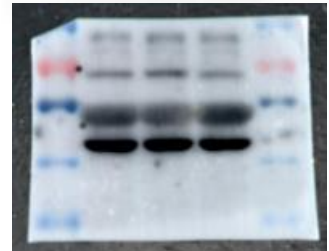

|     |   |   |   |
|-----|---|---|---|
| CCK | - | + | + |
| JQ1 | - | - | + |

pro-Cat L

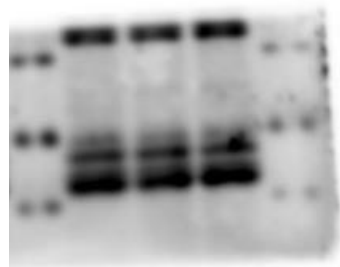

m-Cat L

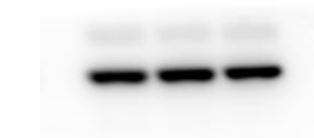

β-actin

|     |   |   |   |
|-----|---|---|---|
| CCK | - | + | + |
| JQ1 | - | - | + |

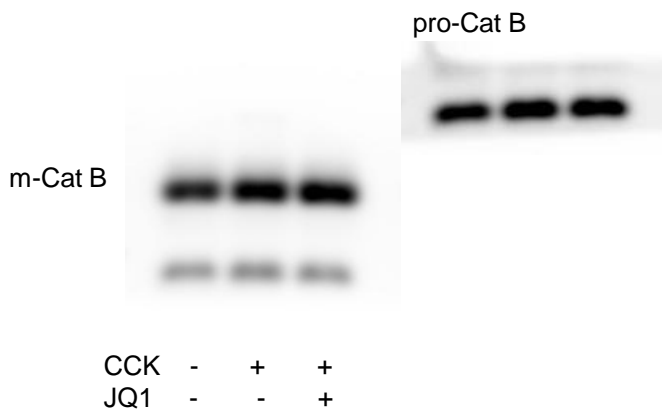

Figure 4

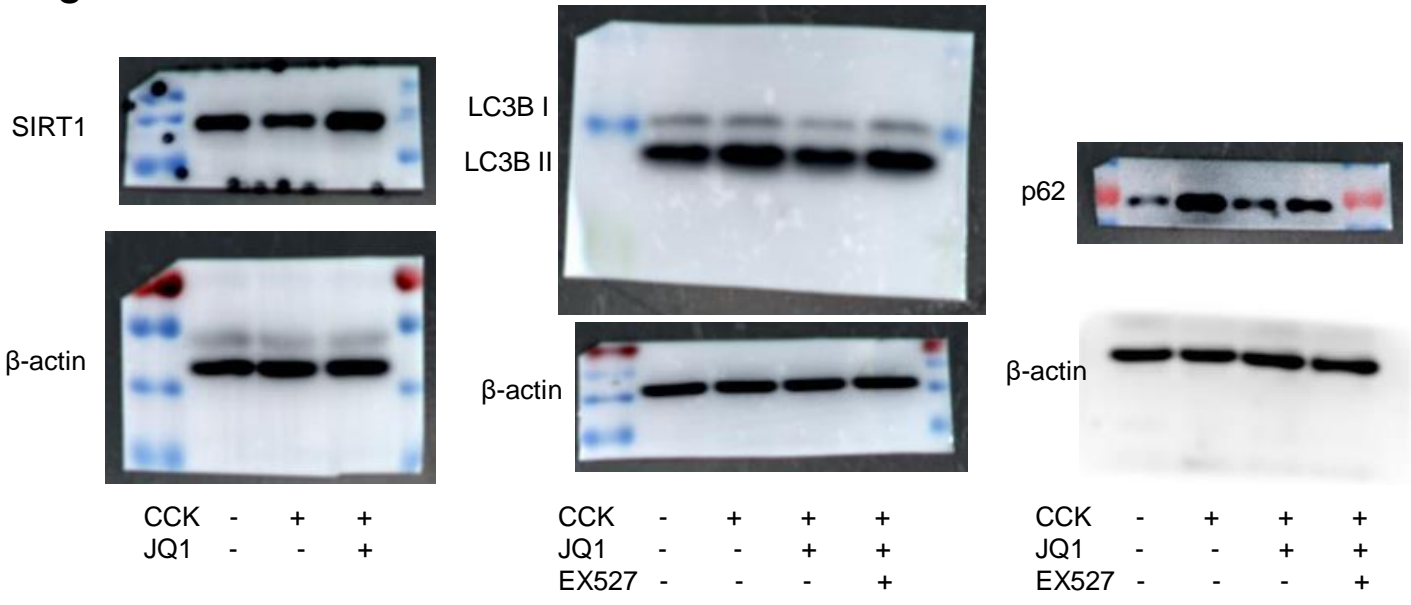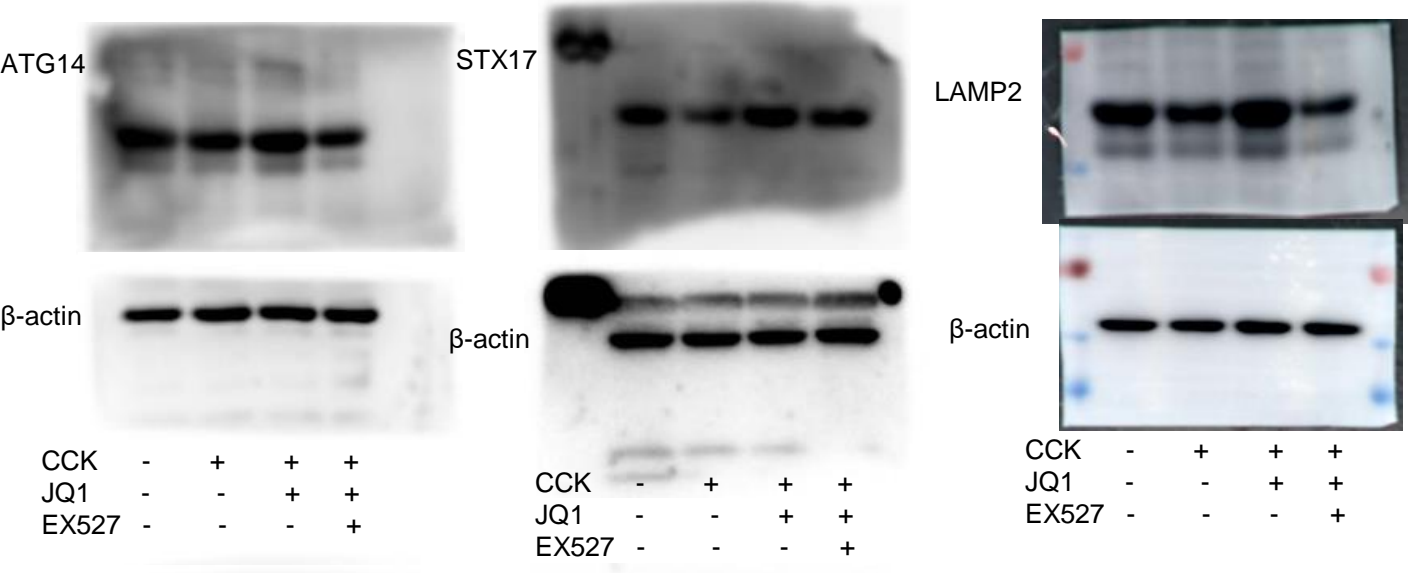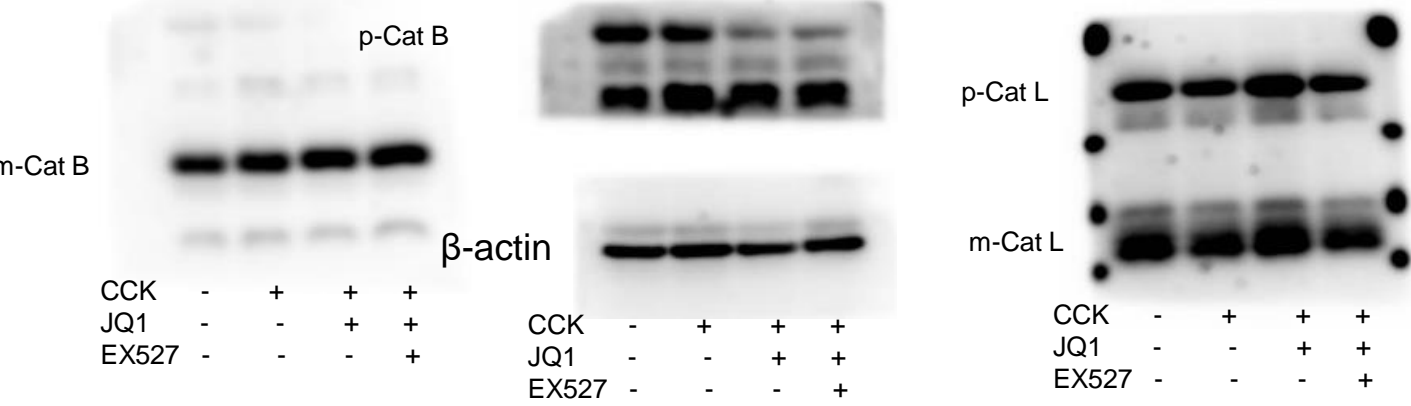

# Figure 6

LC3B

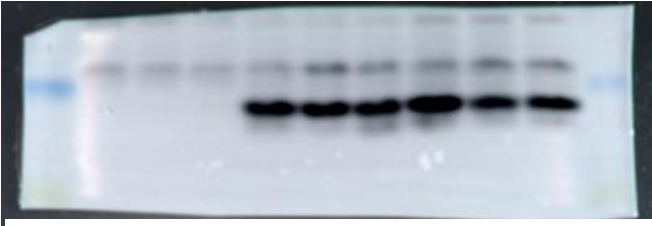

LC3B

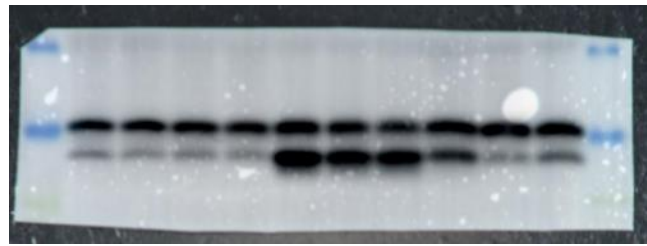

P62

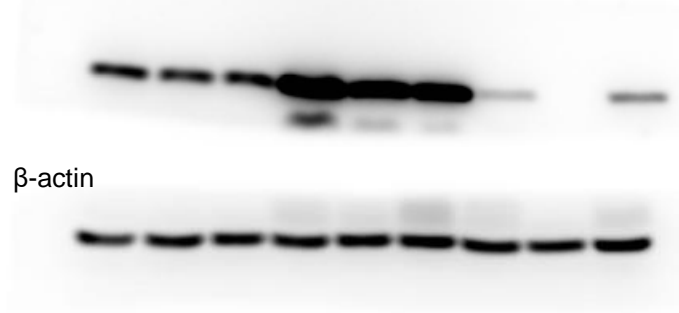

$\beta$ -actin

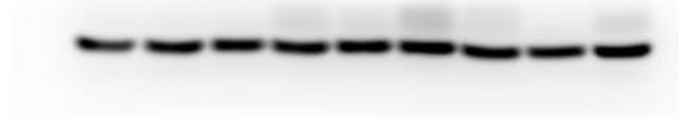

Ctrl

CER

CER+JQ1

$\beta$ -actin

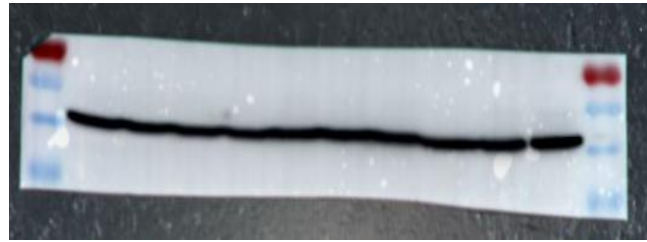

Ethanol

Ethanol+POA

Ethanol+POA  
+JQ1

P62

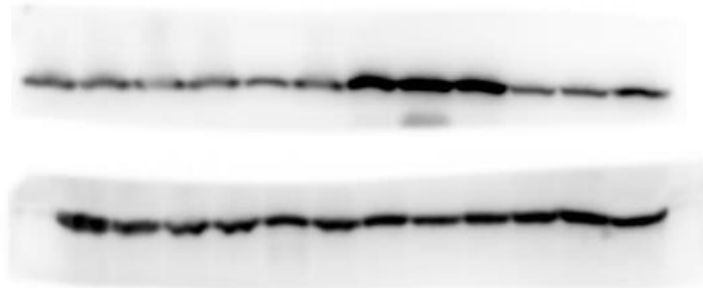

$\beta$ -actin

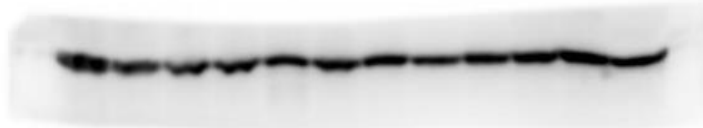

Ethanol

Ethanol+POA

Ethanol+POA  
+JQ1

ATG14

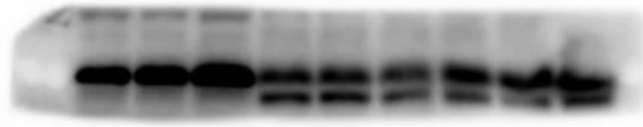

STX17

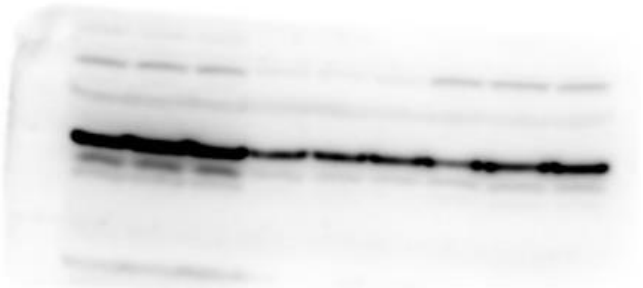

$\beta$ -actin

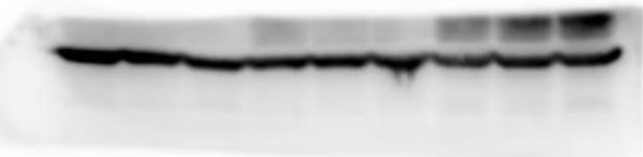

Ctrl

CER

CER+JQ1

ATG14

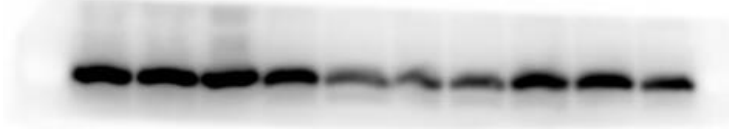

STX17

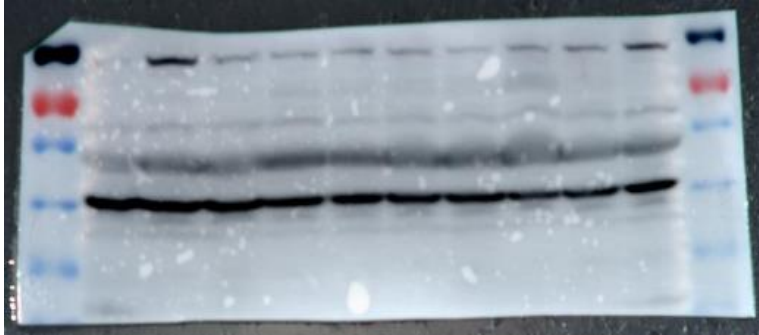

$\beta$ -actin

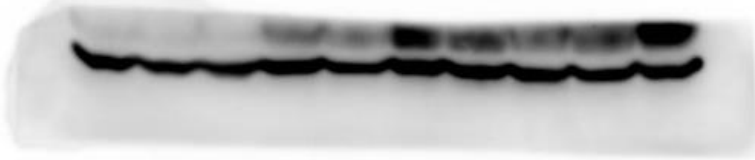

Enthanol

Ethanol+POA

Ethanol+POA +JQ1

LAMP2

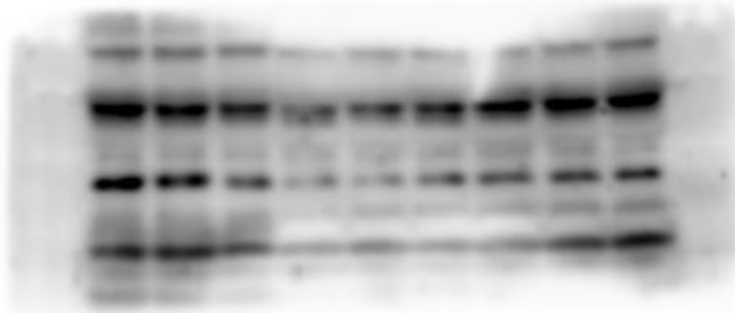

$\beta$ -actin

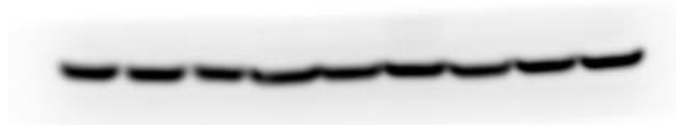

Ctrl

CER

CER+JQ1

LAMP2

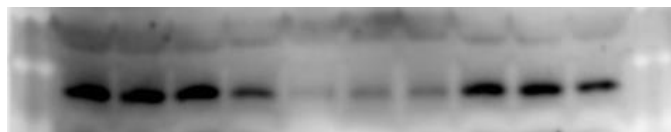

$\beta$ -actin

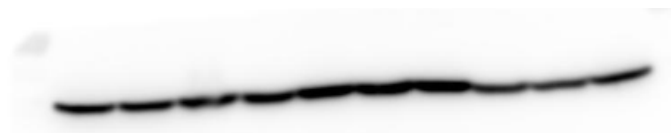

Enthanol

Ethanol+POA

Ethanol+POA +JQ1

# Supplementary Figure Full Scans of WB

S1

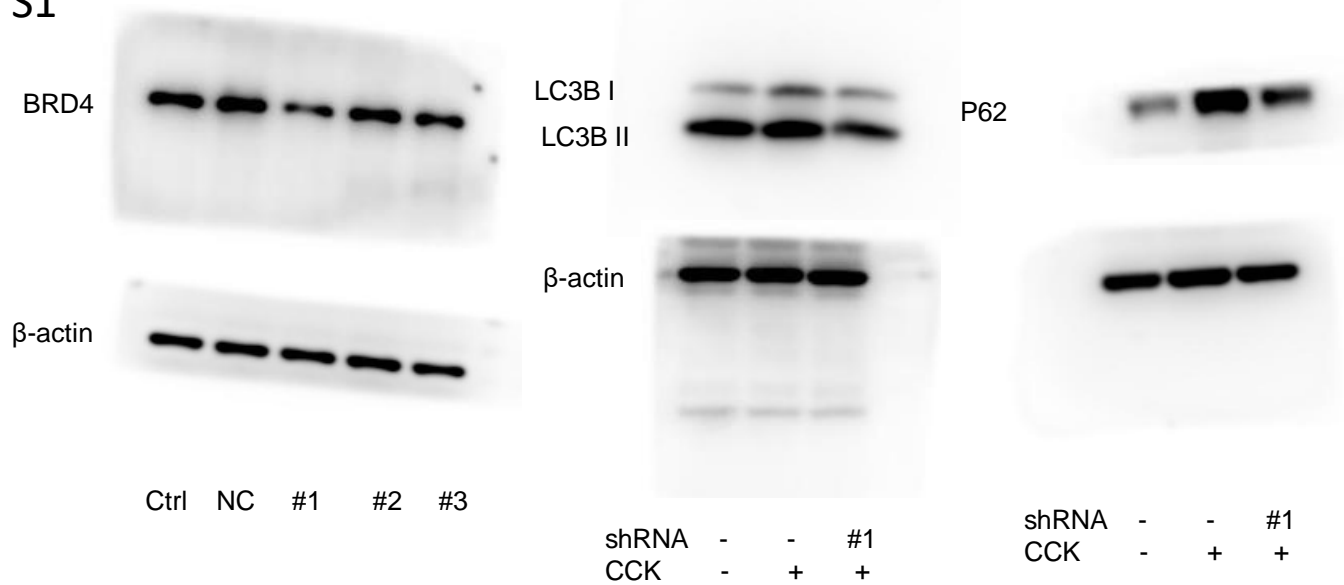

S2

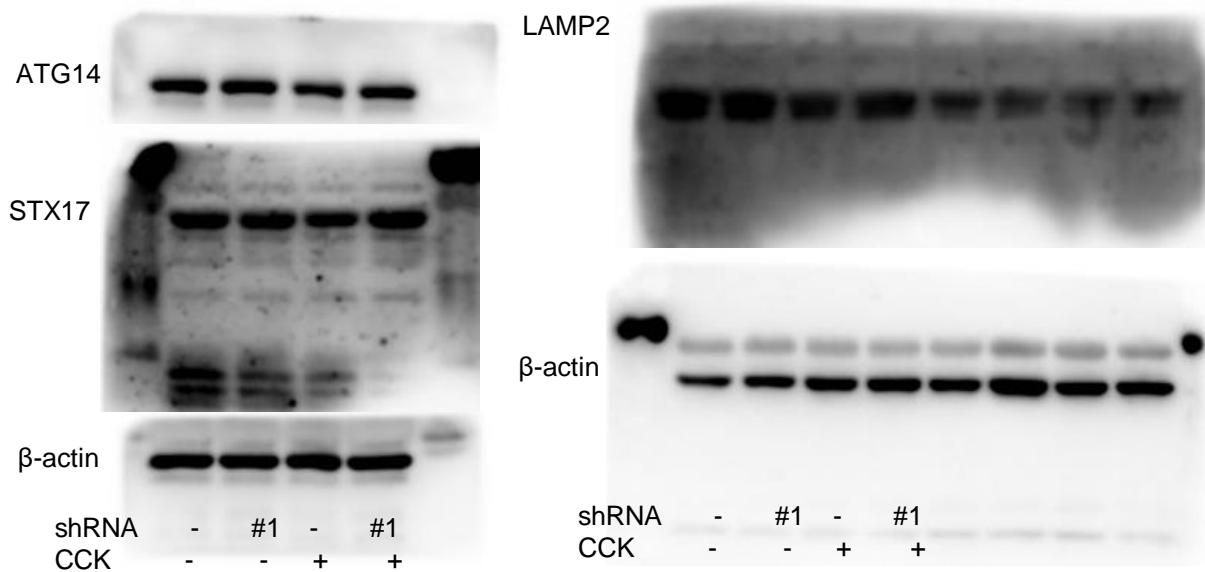

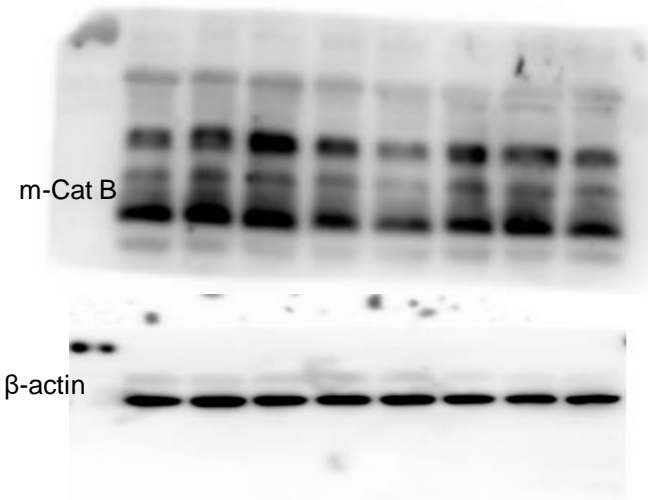

|       |   |    |   |    |
|-------|---|----|---|----|
| shRNA | - | #1 | - | #1 |
| CCK   | - | -  | + | +  |

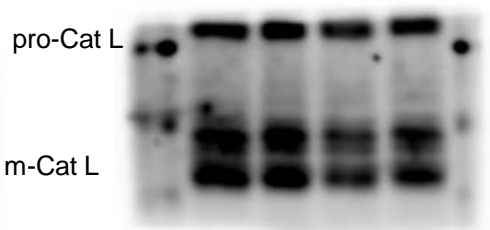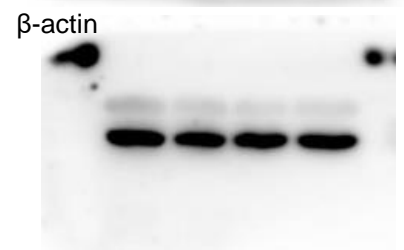

|       |   |    |   |    |
|-------|---|----|---|----|
| shRNA | - | #1 | - | #1 |
| CCK   | - | -  | + | +  |

S4

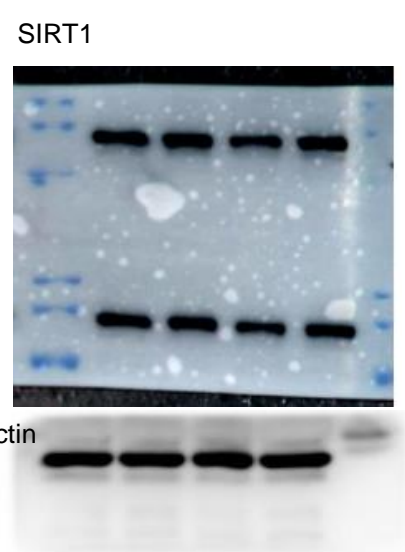

S5

|       |   |    |   |    |
|-------|---|----|---|----|
| shRNA | - | #1 | - | #1 |
| CCK   | - | -  | + | +  |

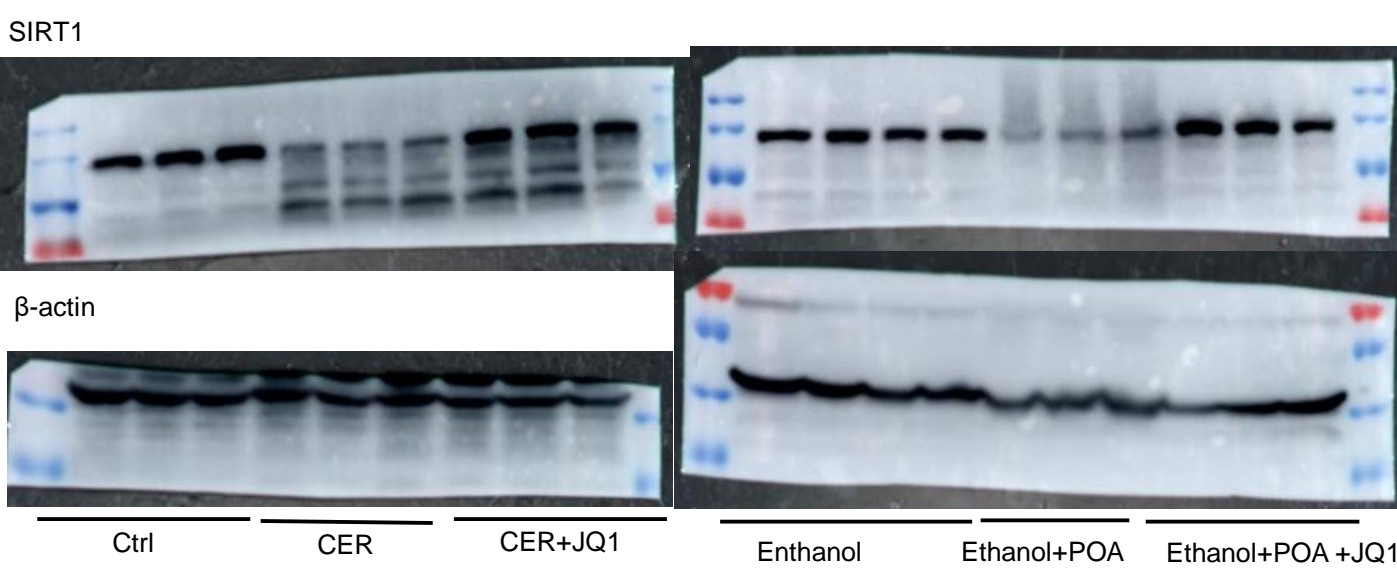

Ctrl      CER      CER+JQ1      Ethanol      Ethanol+POA      Ethanol+POA +JQ1
