# Supplementary material for: BRD4 Inhibition Protects Against Acute Pancreatitis Through Restoring Impaired Autophagic Flux
Source: PubMed Central journal article supplement (PMC7227015; doi:10.3389/fphar.2020.00618), 2020-05-08

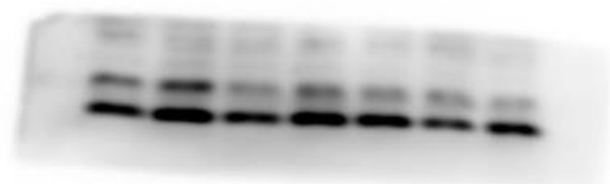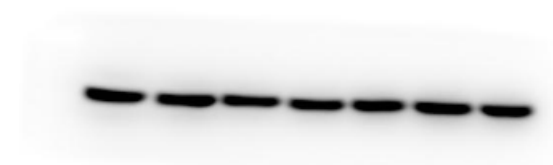

Supplement: DataSheet_3.pdf [file DataSheet_3.pdf]
